# Supplementary material
Source: Springer Nature journal article supplement (https://www.springermedizin.de/resource/supplementary/12879_2008_768_MOESM3_ESM.pdf/9449798)
Supplement: MOESM3 [file 9449798]

HFMD

One of:

- rash on palms &/or soles
- mouth vesicles &/or ulcers
- herpangina

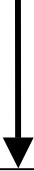

History of fever, or fever on examination ( $\geq 38^{\circ}\text{C}$ ), and  $\geq 1$  of:

- toxic and ill
- recurrent vomiting (at least twice)
- tachycardia ( $\geq 150/\text{min}$ )
- breathlessness
- poor perfusion
- reduced consciousness (irritability, lethargy, drowsiness, coma)
- limb weakness
- meningism
- seizures

NO

YES

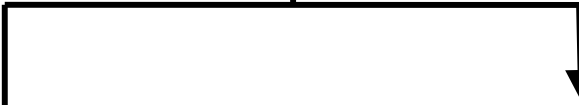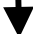

CSF examination  
Cell count  $>5$  white cells/ $\mu\text{L}$

NO

YES

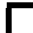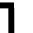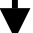

Mild HFMD  
N=540

Severe HFMD without  
CNS involvement  
N=83

HFMD with CNS  
complication  
N=102
